# Supplementary material for: Fine Mapping and Candidate Gene Validation of Tomato Gene Carpelloid Stamen and Parthenocarpy (CSP)
Source: MDPI journal article supplement (doi:10.3390/horticulturae10040403), 2024-04-16
Supplement: s1 [file s1]

# Fine Mapping and Candidate Gene Validation of Tomato Gene *Carpelloid Stamen and Parthenocarpy (csp)*

Shanshan Li, Kai Wei, Li Zhang, Yu Ning, Feifei Lu, Xiaoxuan Wang, Yanmei Guo, Lei Liu,  
Xin Li, Can Zhu, Yongchen Du, Junming Li and Zejun Huang\*

State Key Laboratory of Vegetable Biobreeding, Institute of Vegetables and Flowers, Chinese Academy of  
Agricultural Sciences, Beijing 100081, China; 19310462086@163.com (S.L.); 82101209110@caas.cn (K.W.);  
82101219106@caas.cn (L.Z.); ny271565853@163.com (Y.N.); 15514907620@163.com (F.L.)wangxiaoxuan@caas.cn  
(X.W.); guoyanmei@caas.cn (Y.G.); liulei02@caas.cn (L.L.); lixin10@caas.cn (X.L.); zhucan@caas.cn (C.Z.);  
duyongchen@caas.cn (Y.D.); lijunming@caas.cn (J.L.)

\*Correspondence: huangzejun@caas.cn

## supplementary Figures and Tables

TGGCTCGTGGTAAGATCCAGATCAAGAAAATAGAAAACCAACAAATAGACAAGTGACTTATTCAAAGAGAAGAAA  
TGGGCTATTCAAGAAGGCTAATGAACTACTGTCTTTGTGATGCTAAAGTTTCAATTGTTATGATTCTAGTACTGGAA  
AACTTCATGAGTTTATAAGTCCCTCTATCACGTAAGTAAACAACTTTATTTTATTTTATTTTGTGTAATGCCTTGAATCG  
GACCCGCTACAAACAGAAAGGACGGGGGTCTCGCTGCCCGGTACGAGTCCGGGGGTCCAGGGGGGCGACGCGC  
CCCCTGGCCTGGGGGTCCGGGGGGGCGAGACGCCCCGGGCCGACGGTATACAATGTTGTGTGATTGGGCCCTTAA  
TTTTCTGTGATTCTGTATGTTGGGCCAAGCCTGTTAGGGCGTAGCTTAGCACTATATATAGACGCTATGGGAAACCTT  
ATTCTGTAATTCTGTTTTGCTCTCCATAATAAACTGCTCCCTCTCTCCCGTGGACGTAGCCAATTTGTTGGTGAAC  
CACGTAATCTGTGTCTTATTTTCGCGTTTATATTTCTCGTATTATCTCAAATCCGCACAACAAATTTGGTATCAGAG  
CCTCTCGGTAAATCGGTGTTCTTGGAGAATTCGAGATGTCTGCTTTGAACGTGAAAATCGACAAATTCACAGGGAGGA  
ACAGTTTCAGTTTATGGCAGATCAAGATGCGGGCCTTGTGAAACAGCAAGGCTTCTGGGCGCCGTTGTGAAAGAC  
AAGAACGCCGTCTTACTCCTGAGATGGCGATTCTGGAGGAAAAGGCGCACTCGACGATCATGCTGTGTCTCGCGGA  
TGACGTCATCACGGAGGTCTCGGATGAAGAGACTGCTGCTGGTCTGTGGTTGAAGCTGGAGAGTTTGATACATGACAA  
AATCTCTAACCAACAAGCTGCTTCTGAAACAACGTCTATTGCGTTTACGAATGGCTGAAGGTACACAATCAGGGAA  
CACTTAGAGCAATTGAATACTTTGTTATTAGAATTGCGTAATATCGATGTGAAGATCGAGGATGAAGATGCTGCCCTGA  
TTCTGTTAGTATCTCTCCAATGTCGTTTGAGAATTTGTTCAATCGTTTATTGTTGGGAAAGATACTGTGTCAGTGGAA  
GAAGTCAGATCAGCCCTTCATAGCAGGAATTACGGCATAAGGCTAACGGCACAAGTACGGACATACAGCCTTCCGG  
TCTGTTACCAGTAGCAGAAAGGGAAGGAAAAACGGCGGAAAGAAAAATAAGCCGATGTGCAAGGGTGCAAGGCC  
GGATGATGTTTGAATTACTGCAAGGAGAAGGGACATTGGAATTTGATTGTCCGAAGAAGAAGAAGCAATCGGAA  
AAACAATCAGTGTCTGCTGTGCTGAAGAAGACCAATTCTGAAGAAGATATTGCCCTAGTTGCGGATGAGCA  
CACTCATCATTAGATGTGTGGTTCTTGATTCTGGGGCATCCTATCACATCTGTCTAGGAGAGAGTGGTTACGACT  
TATGAGCAGGTAGACGGAGGCAGCATCTCGATGGCCAACAGTTCTGTCTGCAAGGTGGTTGGGACAGGCTCGATCAA  
GATAAGGACACATGACGGTAGCTTCTGCACATTGAACGAGGTACGGCACGTTCATTGATGACGAAAAATCTGATAT  
CTCTCAGTCTTTTGACAGCAAGGATTCTAGCTGGTGGGAAAAGATGGAGTCTTGCGGGTCTGGAAGGGTTCAAAT  
TTGATTCTGAAAGGTGTCATGCGTGGTACTTTGTATTTTCTACAAGGTTCCACGGTTACAGGTTACAGCCATGTTGCAT  
CGTCAGAAATTCACCAGAAGGATATGACTAAGTTATGGCACATAAGACTTGGTCATATGGGTGAAAGAGGGATGCAA  
ATTCTGTCAAAGGAGGATTACTTGCTGGTCATAAGGTTAAGAGCCTAGAGTTTTGTGAACATTGTGTTTTTGAAAAAC  
TACATCGCAACAAGTTTCAAAGGCCATTATAGAACAAAAGGCACACTTGATTATATCCATTCTGATTGCTGGGGTC  
CATGCCGTGTTGAGTCTTTGGGAGGCTGCAGATTTTTGTGTCCATTATTGATGACTACTCAAGGATGACTTGGGTGTA  
CATGATGAAGCATAAAAGTGAAGCCTTCCAGAAGTTCAAGGAGTGAAAAATTTGATGGAAAAATCAAACAGGGAAG  
AAGATCAAGAGGTTGCGAACTGATAATGGGCTGGAATTCTGTTGGTCTGAATTGATCAATTCTGTAAGGATGAAGGG  
ATTGCTCGACATCGCACAGTCAGAAATACACCACAGCAGAACGGTGTAGCTGAGCGGATGAATCAAACACTTCTGG  
AGAGAGCAAGGTGCATGCTCTAATGCTGGGCTAGATAGAAGATTCTGGGCAGAAAGCGGTTAGTACAGCTTGCTAC  
TTGATTAACCGCGGACCACATACAGGTATACAGTGCAAGACACCTATGGAGATGTGGTCTGGAAAAGCTGCTGATTAT

TCAAATCTGAAAGCTTTTGGTTGTACGGCTTACTATCACGTCAAGGTAAGTTAGAACCAAGAGCTAAAAAGGG  
 AGTATTTGTGGGCTACGGAGATGGAGTGAAAGGTTTCAGAATCTGGTCTCCAGCAGAAAAGAGGGTTATTATGAGCA  
 GGAACGTTGTCTTTGATGAAAGTCCTCTGCTTAGAACCATTGTGAAGCCTACAACCTACGTGAGAACTGGGAGTCTTG  
 ACAAACAGGTGGAGTTTCAAGTCATTCAGAACGAGAGCGATTAAAGGAACCTGAAGAGGAGGATCAAGAGCCAC  
 AGACTGAACTGATATTCCAGAATCTATGCCATCAGATATCCATCAGAGTATAGCTCAAGATCGGCCAAGGAGGGTTG  
 GAGTTCGGCCACCTACGAGGTATGGTTTTGAGGACATGGTGGGTATGCACTGCAGGTGCTGAAGAGGTAGATACAT  
 CTGAGCCGTCTACTTACAAAGAAGCCATTTTAAGTTCTGATTCTGAAAAATGGTTTGCCGCTATGGGAGATGAGATGG  
 AGTCCCTACACAAGAATCAGACATGGGATCTGGTCATACAGCCTTCGGGGAGAAAGATTATTACTTGCAAATGGGTTT  
 TCAAGAAGAAGGAAGGGATATCACCAGCAGAAGGAGTCAAGTATAAAGCCAGGGTTGTGCCAGAGGTTTCAACCA  
 AAGAGAGGGAGTGGACTATAATGAGATCTTCTCACCAGTGGTCAGACATACTCCATCCGAGTGTTACTAGCGATAGT  
 TGCACATCAGAATCTGGAGCTTGAACAACCTTGATGTGAAGACAGCGTTTCTACATGGAGAGTTGGAGGAAGAGATAT  
 ACATGACTCAGCCGGATGGTTTCCAAGTTCAGGGAAGGAAAATCACGTCTGCAAGTTGAAGAAGTCCTTATATGGA  
 CTTAAGCAGTCTCCAAGGCAGTGGTATAAAAGGTTTGACAGCTATATGGTGAAGTTGGGCTATACTCGGAGCTCATAT  
 GATTGTTGTGCTACTACAATAGGCTCAATGATGATTCAATCATCTATCTGGTGCTTTATGTAGATGATATGTTGATAGCT  
 GCAAAGAAGAAGTATGACATTCAGAAGCTGAAGGGTTTACTTAGTGCTGAGTTTGAGATGAAGGATCTGGGAGCCG  
 CTCGGAAGATTTTAGGGATGGAGATCATTAGAGACAGAGAGAGAAGGAAAACCTTTCTTGTACAGAGAAGCTACATT  
 CAGAAGGTCTTGGCGAGGTTTGGCATGTCTTCACTAAGCCCATGATACCCCGAGTGCTGCCAATATCCATCTCACTG  
 CCATGTTGCTCCACAGTCAGAAGAAGAGAAGGAGTATATGTCACGAGTCCCTTATGCCAGTGCCGTAGGAAGTTTG  
 ATGTATGCTATGGTCTGTACAAAGCCAGATTTAGCACATGCAGTCAGTGTAGTGAGCAGATTTCATGGGACAACCAGG  
 GAGAGAACATTGGCAGGCTGTGAAGAGAATTTCCGGTACCTTAGAGGTACATCTGACGTTGGTCTCATTTATGGAGG  
 TGATACTCAGTGCTTGGTTACTGGCTATTCTGATTCACTATGCTGGAGATGTTGACACAAGAAGATCGATGACTGG  
 CTATGTGTTTACCCTTGGAGGATCTGTCGTCAGTTGGAAGGCAACTTTGCAACCTACAGTGACTTTGTCTACTACGGA  
 AGCGGAGTACATGGCCTTGACAGAGGCTGCAAAAGAAGGGATTTGGTTGAAAGGGCTGGTTAGTGATCTTGGTCTGC  
 ATCATGATCAGGCTACGGTGTATTGTGACAGTTTGAGCGCAATTTGTCTAGCCAAGGATCAAGTCCATCATGAGAGAA  
 CCAAGCATATTGACGTAAGGTATCATTTTCTAAGAAGTGAGAAGAGAATCAAGGTGAAGAAAAGTAGGAACCTGCTGAT  
 AATCCTGCTGATATGTTCAAAAGCCGGTTCACAGAGCAAGTTTCAACACTGTTTGGACTTGCTCAACATCAGAAG  
 CTGTTAATTGCCCTGCGGGGCACTCTGAGGAAGAGGGGGAGGCTTGGCACTATCATACTGCGTCTGAAGAATCTGT  
 TCGGAGAATTCAAGTCAAGGTGGAGATTTGTTGAATGCCTTGAATCGGACCCGCTACAAACAGAAAGGACGGGGGT  
 CTCGCTGCCCCGTACGCGAGTCGGGGGGTCCAGGGGGGCGACGCGCCCCCTGGCCTGGGGGTCCGGGGGGGCGGA  
 GACGCCCCCGGGCCGACGGTATACAATGTTGTTGATTGGGCCCTTAATTTCTGTTGATTCTGTATGTTGGGCCAAG  
 CCTGTTAGGGCGTAGCTTAGCACTATATATAGACGCTATGGGAAACCCTATTCTGTAATCTGTTTTGCTCTCCATAA  
 TAAACTGCTCCCTCTCTCCCGTGGACGTAGCCAATTTGTTGGTGAACCAACGTAAATCTGTTGTCTATTTTCGCGTT  
 TATATTTCTCGTATTATCTCAAATCCGCACAACATTTATTATTTTCAAAATTTTGTGTTTGTAAATTATTTTGAATGTTG  
 TTTATGTTTGTGTTAGGACCAACAATGTTTCGATCTGTACCAGAAGACTA

**Figure S1.** The sequence of the *copia* LTR retrotransposon in the *msp* mutant. The red letters indicate *TAP3* gene sequences.

| Plant       | Genotype                                     | Target1                                                 | PAM                                         | Target2 | PAM | In\Del                | Proportion              |
|-------------|----------------------------------------------|---------------------------------------------------------|---------------------------------------------|---------|-----|-----------------------|-------------------------|
| Ailsa Craig | WT                                           | CTTATTCAAAGAGAAGAAATGGGCTATTCAAGAGGCTAA (31bp)          | TCAATTGTTATGATTTCTAGTACTGGAAAACTTCATGAGT    |         |     |                       |                         |
| AT-10       | Chi                                          | CTTATTCAAAGAGAAGAAATGGGCTATTCAAGAGGCTAA (31bp)          | TCAATTGTTATGATTTCTAGTACTGGAAAACTTCATGAGT    |         |     | \                     | 1/11                    |
|             |                                              | CTTATTCAAAGAGAAGAAATGGGCTA-----AGAAGGCTAA (31bp)        | TCAATTGTTATGATT-----ACTGGAAAACTTCATGAGT     |         |     | -10bp                 | 6/11                    |
|             |                                              | CTTATTCAAAGAGAAGAAATGGGCTATTCA-----TACTGGAAAACTTCATGAGT |                                             |         |     | -61bp                 | 4/11                    |
| AT-14       | Chi                                          | CTTATTCAAAGAGAAGAAATGGGCTATTCAAGAGGCTAA (31bp)          | TCAATTGTTATGATTTCTAGTACTGGAAAACTTCATGAGT    |         |     | \                     | 4/10                    |
|             |                                              | CTTATTCAAAGAGAAGAAATGGGCTATTCAAGAGGCTAA (31bp)          | TCAATTGTTATGATTTCTAGTACTGGAAAACTTCATGAGT    |         |     | +1bp                  | 1/10                    |
|             |                                              | CTTATTCAAAGAGAAGAAATGGGCTATTCAAGAGGCTAA (31bp)          | TCAATTGTTA-----CTGGAAAACTTCATGAGT           |         |     | -12bp\T-C             | 3/10                    |
|             |                                              | CTTATTCAAAGAGAAGAAATGGGCTATTCAAGAGGCTAA (31bp)          | TCAATTGTTATGATT-----ACTGGAAAACTTCATGAGT     |         |     | +1bp\~5bp             | 1/10                    |
|             |                                              | CTTATTCAAAGAGAAGAAATGGGCTA-----AGAAGGCTAA (31bp)        | TCAATTGTTATGATTTCTAGTACTGGAAAACTTCATGAGT    |         |     | -4bp                  | 1/10                    |
| AT-15       | Chi                                          | CTTATTCAAAGAGAAGAAATGGGCTATTCAAGAGGCTAA (31bp)          | TCAATTGTTATGATTTCTAGTACTGGAAAACTTCATGAGT    |         |     | \                     | 4/12                    |
|             |                                              | CTTATTCAAAGAGAAGAAATGGGCTATTCAAGAGGCTAA (31bp)          | TCAATTGTTATGATTTCTAGTACTGGAAAACTTCATGAGT    |         |     | +1bp                  | 4/12                    |
|             |                                              | CTTATTCAAAGAGAAGAAATGGGCTATTCAAGAGGCTAA (31bp)          | TCAATTGTTATGATT-----ACTGGAAAACTTCATGAGT     |         |     | +1bp\~6bp             | 1/12                    |
|             |                                              | CTTATTCAAAGAGAAGAAATGGGCTA-----GAAGGCTAA (31bp)         | TCAATTGTTATGATTTCTAGTACTGGAAAACTTCATGAGT    |         |     | -5bp                  | 1/12                    |
|             |                                              | CTTATTCAAAGAGAAGAAATGGGCTATTCAAGAGGCTAA (31bp)          | TCAATTGTTATGATT-----CTGGAAAACTTCATGAGT      |         |     | -6bp                  | 1/12                    |
|             |                                              | CTTATTCAAAGAGAAGAAATGGGCTA-----AGAAGGCTAA (31bp)        | TCAATTGTTATGATTTCTAGTACTGGAAAACTTCATGAGT    |         |     | -12bp                 | 1/12                    |
| AT-19       | Chi                                          | CTTATTCAAAGAGAAGAAATGGGCTATTCAAGAGGCTAA (31bp)          | TCAATTGTTATGATTTCTAGTACTGGAAAACTTCATGAGT    |         |     | \                     | 1/12                    |
|             |                                              | CTTATTCAAAGAGAAGAAATGGGCTATTCA-GAAGGCTAA (31bp)         | TCAATTGTTATGATTTCTAG-----CTGGAAAACTTCATGAGT |         |     | -3bp                  | 3/12                    |
|             |                                              | CTTATTCAAAGAGAAGAAATGGGCTATTCA-GAAGGCTAA (31bp)         | TCAATTGTTATGAT-----GGAAAACTTCATGAGT         |         |     | -11bp                 | 2/12                    |
|             |                                              | CTTATTCAAAGAGAAGAAATGGGCTATTCAAGAGGCTAA (31bp)          | TCAATTGTTATGATT-----ACTGGAAAACTTCATGAGT     |         |     | -5bp                  | 1/12                    |
|             |                                              | CTTATTCAAAGAGAAGAAATGGGCTATTCA-----TACTGGAAAACTTCATGAGT |                                             |         |     | -61bp                 | 5/12                    |
| Plant       | Genotype                                     | Target1                                                 | PAM                                         | Target2 | PAM | In\Del                | Proportion              |
| Ailsa Craig | WT                                           | CTTATTCAAAGAGAAGAAATGGGCTATTCAAGAGGCTAA (31bp)          | TCAATTGTTATGATTTCTAGTACTGGAAAACTTCATGAGT    |         |     |                       |                         |
| AT-1        | Bi                                           | ATTAACGCCGAATTAATTCGGCGTTAATTCAGTACA-----               |                                             |         |     | C-A\+32bp\~107bp      | 10/12                   |
|             |                                              | CTTATTCAAAGAGAAGAAATGGGCTATTCA-----TACTGGAAAACTTCATGAGT |                                             |         |     | -61bp                 | 2/12                    |
| AT-11       | Bi                                           | CTTATTCAAAGAGAAGAAATGGGCTATTCA-----                     |                                             |         |     | ~99bp                 | 5/11                    |
| TCT (41bp)  | TGTGTTTGGCATCCCTTTCCA (-91bp)                | -----                                                   |                                             |         |     | G-T, A-T\+20bp\~291bp | 6/11                    |
| AT-20       | Mu                                           | CTTATTCAAAGAGAAGAAATGGGCTATTCA-----TACTGGAAAACTTCATGAGT |                                             |         |     | -61bp                 | 2/12                    |
|             | GTC (+146bp) (-178bp)                        | -----TATTGGAGAGGCTAATGAACCTACTGTTCTTT-----              |                                             |         |     | ~36bp                 | A-G\+146bp\CA-GG\~292bp |
|             | GTC (+105bp) (-53bp) (10bp) (+30bp) (-115bp) | -----TATTGGAGAGGCTAATGAACCTACTGTTCTTT-----              |                                             |         |     | ~36bp                 | A-G\+135bp\CA-GG\~282bp |
| AT-22       | Bi                                           | CTTATTCAAAGAGAAGAAATGGGCTATTCA-----TACTGGAAAACTTCATGAGT |                                             |         |     | -61bp                 | 2/12                    |
|             | GTC (+146bp) (-178bp)                        | -----TATTGGAGAGGCTAATGAACCTACTGTTCTTT-----              |                                             |         |     | ~36bp                 | A-G\+146bp\CA-GG\~292bp |
| AT-28       | Chi                                          | CTTATTCAAAGAGAAGAAATGGGCTATTCAAGAGGCTAA (31bp)          | TCAATTGTTATGATTTCTAGTACTGGAAAACTTCATGAGT    |         |     | \                     | 4/10                    |
|             |                                              | CTTATTCAAAGAGAAGAAATGGGCTA-----AGAAGGCTAA (31bp)        | TCAATTGTTATGATTTCTAGTACTGGAAAACTTCATGAGT    |         |     | -4bp                  | 1/10                    |
|             |                                              | CTTATTCAAAGAGAAGAAATGGGCTATTCA-----TACTGGAAAACTTCATGAGT |                                             |         |     | -61bp                 | 2/10                    |
|             | GTC (+144bp) (-178bp)                        | -----TATTGGAGAGGCTAATGAACCTACTGTTCTTT-----              |                                             |         |     | ~36bp                 | A-G\+144bp\CA-GG\~292bp |
|             | TCT (52bp)                                   | CTTATTCAAAGAGAAGAAATGGGCTATTCA-----TACTGGAAAACTTCATGAGT |                                             |         |     |                       | 1/10                    |
|             | GTC (+105bp) (-53bp) (10bp) (+30bp) (-115bp) | -----TATTGGAGAGGCTAATGAACCTACTGTTCTTT-----              |                                             |         |     | ~36bp                 | A-G\+135bp\CA-GG\~282bp |

**Figure S2.** Sequence variations of the *TAP3* gene-edited T<sub>0</sub> generation plants. *tap3*<sup>cr</sup> mutant alleles identified from three T<sub>0</sub> plants. WT represents the wild type, Ho represents the homozygous mutation, Mu represents the multi-allele mutation, and He represents the heterozygous mutation. The red letters represent the target sequence of the *TAP3* gene, the blue letters indicate the protospacer-adjacent motif (PAM), the green letter indicates the insertion sequence, and the green hyphens mark the deletion sequences. The number on the right indicates the number of bases inserted or deleted.

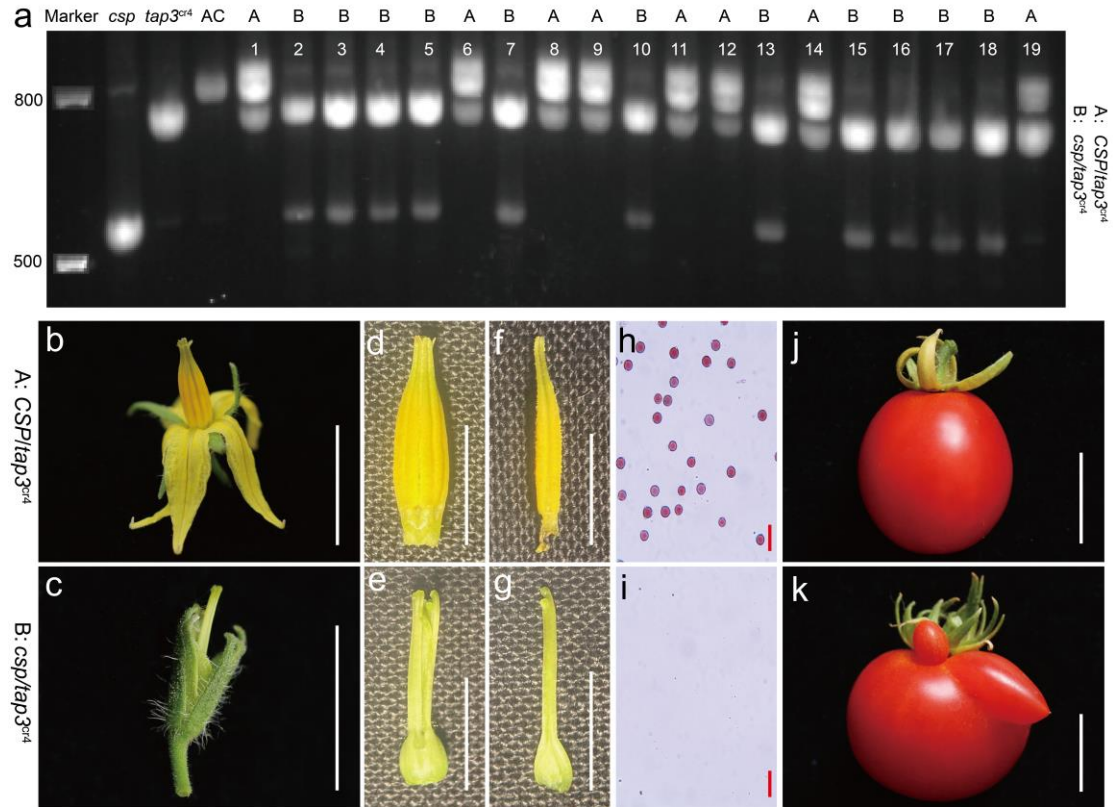

**Figure S3.** An allelism test between the *csp* mutant and *TAP3* gene-edited mutant *tap3<sup>cr4</sup>*. (a) Agarose gel electrophoresis of PCR fragments amplified from *csp*, *tap3<sup>cr4</sup>* and the individualities of their allelism test population. (b) *csp/tap3<sup>cr4</sup>* flower; (c) *csp/tap3<sup>cr4</sup>* flower; the white bar is 1 cm. (d) *csp/tap3<sup>cr4</sup>* anther cone; (e) *csp/tap3<sup>cr4</sup>* anther cone; (f) *csp/tap3<sup>cr4</sup>* stamens; (g) *csp/tap3<sup>cr4</sup>* stamens; the white bar is 0.5 cm. (h) *csp/tap3<sup>cr4</sup>* pollen; (i) *csp/tap3<sup>cr4</sup>* pollen; the red bar is 50  $\mu$ m. (j) *csp/tap3<sup>cr4</sup>* fruit ; (k) *csp/tap3<sup>cr4</sup>* fruit; the white bar is 1 cm.

**Table S1** General information of InDel markers for mapping *CSP*

| Primer Name | Position (SL4.0ch04) | Forward Primer (5'→3')   | Reverse Primer (5'→3')    |
|-------------|----------------------|--------------------------|---------------------------|
| HP847       | 61,157,566           | GAGTTGGAGGAACGTGTGTC     | CCTCATGTGTTACCATTTCC      |
| HP613       | 61,656,951           | AACAAATCTTCTCTTCAGCCA    | CCTTTCTGAGGCACATTAGG      |
| HP615       | 61,797,919           | GCCAGCCTTAAATATTCCAC     | CAGAAAGGCAACAATGAAGAG     |
| HP617       | 62,480,644           | TGTTTTAGTTGCTCATAGGATG   | CCTACCAACACCACACAATC      |
| HP619       | 62,948,718           | GAAATTCTGCTCCCAAATGC     | CTTGAAAAGTATAATCCAGGG     |
| LP3         | 63,000,047           | AGAGAGATTTGCACTCAGTTAGAC | CGGCCTTAAGCAGAGACGGATTC   |
| LP5         | 63,025,077           | CCTGCCTGCATGTACCTCCAGC   | AGCCTGCATGAATCCTCGTTAGC   |
| LP6         | 63,030,842           | GCAATGTACTCATAGTCCTGACA  | AGGGATACAAGAGCGGAGTTAC    |
| LP8         | 63,065,003           | GGCTAAACTTACTGAGCTTCCTCG | ACTGACTCGAACCAACGTAATCA   |
| LP9         | 63,097,942           | GTCCAAACACACATTTACGACGTC | CCTCTTAATTTTCGTGTCCAATTGC |
| HP621       | 63,346,786           | AGCCCTATTATCTGTAATGC     | ACTAAGCTCTTCCTATGTGC      |
| HP3423      | 63,715,686           | CACCTAACTTCGACCCTGCT     | GCATTGATGTCCTGGTAAAGAG    |
| HP4453      | 64,026,342           | GCCATGGCCATCCATTCTAC     | GTTTTCCCCATTATGACATTTC    |

**Table S2** General information of primers for amplification and sequencing of *TAP3* gene

| Primer Name | Forward Primer (5'→3')  | Reverse Primer (5'→3')  |
|-------------|-------------------------|-------------------------|
| LS1         | GCCACATGGTTGAAGTACATTCC | CTCATGAAGTTTCCAGTACTAG  |
| LS2         | AGTTAACTTGACCTTCTAGGGT  | AGCTTCCTTAGCTGCTCTTGC   |
| LS3         | ATCCAAGATCTCGATCGATCC   | TCGTCTTTGTGAGCTTGTTAC   |
| LS4         | TGTCGAGTGAAATCTAAGAAGGT | AGGTATTAACAAGCTTAAGCACT |
| LS5         | AGGTGATTGGCAATCAGATTGA  | ATCATGTATTGTTGGGGCAGAG  |
| LS6         | GTGCAAGATACATATTGTGTGGC | AGGTTAGGTACGAATTCGATCG  |

**Table S3** The primers for sequencing the *copia* LTR retrotransposon in the *csp* mutant

| Primer name | Primer sequence (5'→3')   |
|-------------|---------------------------|
| M13F        | GTAAAACGACGGCCAGT         |
| 7B-2        | GTAGCTGAGCGGATGAATCAAACA  |
| 7B-3        | GAGATGGAGTCCCTACACAA      |
| 7B-4        | ACATCTCCATAGGTGTCTTGC     |
| 7B-5        | CCTCGTTCAATGTGCAGAAGCTACC |
| 7B-6        | GTTTGATGTATGCTATGGTCTGTAC |
| 7B-7        | CTTGCTCAACATCAGAAGCTGTAA  |
| 7B-8        | AGCAGCAGTCTCTTCATCCGAGAC  |
| M13R        | CAGGAAACAGCTATGAC         |
| csp-LTR-F   | GCTGTTGGGTGACAAGTGAAGT    |
| csp-LTR-R   | TCTAACCGTAAAGGGCATGTTGA   |
| csp-LTR-R1  | GGTCCGATTCAAGGCATTCAA     |

**Table S4** The primers used in Real-Time PCR

| Primer name                        | Forward primer (5'→3')       | Reverse primer (5'→3')    |
|------------------------------------|------------------------------|---------------------------|
| <i>TM6-Q</i>                       | CTCCATTTCGCAAATGCCACAGC      | GAAGGCGAGGAAGTTAGAAGAGCAA |
| <i>TAP3-Q</i>                      | TATAAGTCCCTCAATCACGACCA      | GATCATTTAGGCTTTCTCCCATC   |
| <i>TPI-Q</i>                       | TCTGGGAGGAGACTATGGGATG       | TCAGACTGCTTGGCACTGATACTA  |
| <i>SIGLO1-Q</i>                    | GCTTACTGGAAGAAGATTGTGGG      | CTCATTCTGTTTTTCACGGATACC  |
| <i>MC-Q</i>                        | AAGTAGCAGAAGCAAGGAGGA        | CAAGCGATTAGCAAAGAGTGA     |
| <i>TAG1-Q</i>                      | ATGAACTTGATGCCAGGGAGT        | GGGGTTGGTCTTGTCTAGGGTA    |
| <i>TM5-Q</i>                       | CTTTGTGATGCTGAGGTTGCTC       | TTTCCAGTGCTTCTCGTGTTG     |
| <i>TAGL2-Q</i>                     | CAGCAGCAACATCCTCAATCTC       | CACAGCATCCAACCAGGTATCA    |
| <i>Asparatic protease-Q</i>        | GTGATATTAATTGGCTTCAATGTGAACC | ATACTCGCCGGAACCTGTAACATC  |
| <i>Sister chromatid cohesion-Q</i> | AGTGAGATCATGAGAATTACAGCTCC   | GATGAAGTTTGACAGCACTTTCTTG |
| <i>SITTS</i>                       | AAGCCACCATCACCTTAT           | TCAGCCTGTTCAACTAATG       |
| <i>TAGL11</i>                      | TCTACTGAGGAGGAAGGAA          | AAGTTGAGATGTCCAGAGTAT     |
| <i>SICTIN</i>                      | GGGATGGAGAAGTTTGGTGGTGG      | CTTCGACCAAGGGATGGTGTAGC   |

**Table S5** The primers for CRISPR/Cas9 gene editing

| Experiment                                                      | Primer name | Primer sequence (5'→3')         |
|-----------------------------------------------------------------|-------------|---------------------------------|
| Detection of target sequences of genetically modified materials | CX-F        | GTGACAAGTGACTGATAACTGAG         |
|                                                                 | CX-R        | CCAATAGTCTTCTGGTACAGATCG        |
| gRNA amplify                                                    | CSP-F       | TTCATCTCGGGTCTCGTTTGAGAAATGGGC  |
|                                                                 |             | TATTCAAGAGTTTTAGAGCTAGAAATAG    |
|                                                                 | CSP-R       | TTCATCTCGGGTCTCTAAACGTACTAGAAAT |
|                                                                 |             | CATAACAATGACCGTTGATAGTGGATAG    |
| Positive clone detection and sequencing                         | MGET-F1     | GTCGTCACACAACCTGGGCTTC          |
|                                                                 | MGET-R1     | AACTTGAGACAGTCATTTCCGA          |
|                                                                 | MGET-S1     | ATCTTAATCTCTTCTGGTGGCT          |
| T-DNA detection                                                 | Cas9-909F   | GCAGCTCTCCAAGGACACAT            |
|                                                                 | Cas9-2450R  | CGTGAGTTCTTCTGGCCCTT            |
| Target mutation detection                                       | M13F        | GTTGTAAAACGACGGCCAG             |
|                                                                 | M13R        | CAGGAAACAGCTATGAC               |

**Table S6** PCR amplification system

| Component                          | Volume (μL) |
|------------------------------------|-------------|
| Template DNA: pCBC-S1              | 2           |
| 2×Phanta Max Master Mix (Dye Plus) | 25          |
| CSP-F (10 μmol/L)                  | 1           |
| CSP-R (10 μmol/L)                  | 1           |
| ddH <sub>2</sub> O                 | 21          |

**Table S7** Golden Gate reactions system

| Component                         | Volume (μL) | Reaction conditions                                                                                                                                  |
|-----------------------------------|-------------|------------------------------------------------------------------------------------------------------------------------------------------------------|
| CRISPR Target DNA (0.5-50 umol/L) | 2           | 5 hours at 37°C ;<br>5 min at 50°C ;<br>10 min at 80°C ;<br>Note: It is essential to use a High Concentration (HC) Ligase (2 million units/ml, NEB). |
| pMGET-GFP ( ~ 100 ng/μL)          | 2           |                                                                                                                                                      |
| 10 ×T4 DNA Ligase Buffer (NEB)    | 1.5         |                                                                                                                                                      |
| 10 ×BSA                           | 1.5         |                                                                                                                                                      |
| BsaI (NEB)                        | 1           |                                                                                                                                                      |
| Hi-T4™ DNA Ligase (HC, NEB)       | 5           |                                                                                                                                                      |
| ddH <sub>2</sub> O                | 2           |                                                                                                                                                      |
| Total volume                      | 15          |                                                                                                                                                      |
